# Supplementary material
Source: ML conference proceedings conference paper supplement (https://openaccess.thecvf.com/content/ICCV2025/html/Lu_Serialization_based_Point_ICCV_2025_paper.html)
Supplement: Supplementary file 1 [file Lu_Serialization_based_Point_ICCV_2025_supplemental.pdf]

# Serialization based Point Cloud Oversegmentation

## Supplementary Material

### A. Implementation details

In this section, we provide more implementation details of the experiments. Our implementation primarily refers to the Pointcept codebase [1]. The train settings are shown in Tab. 1. The model settings are presented in Tab. 2. The data augmentations shown in Tab. 3 are the same as those in PTv3 [2].

#### A.1. A.Implementation details

In this section, we provide more implementation details of the experiments.

##### A.1.1. Model Configuration

We employ a consistent architecture across all experiments with minimal dataset-specific adjustments. Our model utilizes a modified sparse U-Net backbone featuring five-stage symmetric encoder-decoder structure, each with a single block depth. The network’s embedding dimensions progress through [32, 64, 128, 256] in the encoder and [128, 64, 64] in the decoder, with Mamba blocks incorporating conditional positional encoding at the 256 dimensional stages. For hierarchical point cloud processing, we implement a three-level hierarchy using Hilbert curves, organizing points into  $n$ , 1024, 256 segments (where  $n$  represents the original point count). The superpoint feature update module maintains a 64-dimensional feature space and iterates three times, matching the raw point embedding dimension. The superpoint graph interaction component comprises four consecutive layers, utilizing a  $k$ -NN graph structure with  $k=6$  in feature space for the Graph Transformer and  $k=3$  in Euclidean space for the GCN operations. Training is performed on two NVIDIA RTX 4090 GPUs using Adam optimizer with early stopping when validation recall stagnates for 20 epochs, and the final results are reported as the average across all epochs.

### B. Supplemental Explanation

#### B.1. Hilbert Curve Mapping

**Time Complexity.** Our Hilbert curve mapping follows the implementation of PTv3 [2], and its time complexity can be divided into several parts. First, the Coordinate Quantization process discretizes each 3D point into a grid of resolution  $2^m \times 2^m \times 2^m$ , where  $m$  is the bit-depth. This requires  $\mathcal{O}(1)$  operations per point, as quantization involves fixed-bit truncation. Second, the Hilbert Value Generation maps from 3D coordinates to 1D Hilbert indices through iterative bit-level permutations. For  $m$  bits, each point undergoes

| Indoor          |                              | Outdoor         |                              |
|-----------------|------------------------------|-----------------|------------------------------|
| Config          | Value                        | Config          | Value                        |
| optimizer       | AdamW                        | optimizer       | AdamW                        |
| scheduler       | Cosine                       | scheduler       | Cosine                       |
| criteria        | CrossEntropy(1)<br>Lovasz(1) | criteria        | CrossEntropy(1)<br>Lovasz(1) |
| learning rate   | 1e-3                         | learning rate   | 8e-4                         |
| block lr scaler | 0.1                          | block lr scaler | 0.1                          |
| weight decay    | 5e-2                         | weight decay    | 5e-2                         |
| batch size      | 8                            | batch size      | 8                            |
| datasets        | ScanNet /<br>S3DIS           | datasets        | NuScenes /<br>Sem.KITTI      |
| warmup epochs   | 40                           | warmup epochs   | 2                            |
| epochs          | 800                          | epochs          | 50                           |

Table 1. The train settings of indoor and outdoor scenes.

| SpConv setting                               | Value              |
|----------------------------------------------|--------------------|
| embedding channels                           | 64                 |
| encoder depth                                | [1, 1, 1, 1]       |
| encoder channels                             | [32, 64, 128, 256] |
| decoder depth                                | [1, 1, 1]          |
| decoder channels                             | [64, 64, 128]      |
| down stride                                  | [2, 2, 2]          |
| Mamba setting                                | Value              |
| serialization order                          | Hilbert order      |
| embedding layers                             | $4^{th}$           |
| hidden state                                 | 8                  |
| expand                                       | 1                  |
| drop path                                    | 0.1                |
| Superpoint setting                           | Value              |
| granularity                                  | [1024, 256]        |
| initial method                               | average pooling    |
| number of nei. expansion                     | 2                  |
| similarity metric                            | cosine similarity  |
| superpoint dimension                         | 64                 |
| number of iterations(level 1)                | 3                  |
| number of iterations(level 2)                | 3                  |
| loss setting                                 | Value              |
| predefined separation margin $\delta_{dist}$ | 0.5                |
| loss weights $\delta$                        | 1                  |

Table 2. The model settings.

$\mathcal{O}(m)$  bitwise operations (e.g. XOR, shifts) across three dimensions. The total cost for  $n$  points is  $\Theta(n \times m)$ . In practical implementations,  $m$  is bounded (e.g.  $m = 16$ ), reducing this term to  $\mathcal{O}(n)$ . Combining quantization, Hilbert

| Augmentations   | Parameters                                | Indoor | Outdoor |
|-----------------|-------------------------------------------|--------|---------|
| random dropout  | dropout ratio: 0.2, p: 0.2                | ✓      | -       |
| random rotate   | axis: z, angle: [-1, 1], p: 0.5           | ✓      | ✓       |
|                 | axis: x, angle: [-1 / 64, 1 / 64], p: 0.5 | ✓      | -       |
|                 | axis: y, angle: [-1 / 64, 1 / 64], p: 0.5 | ✓      | -       |
| random scale    | scale: [0.9, 1.1]                         | ✓      | ✓       |
| random flip     | p: 0.5                                    | ✓      | ✓       |
| random jitter   | sigma: 0.005, clip: 0.02                  | ✓      | ✓       |
| elastic distort | params: [[0.2, 0.4], [0.8, 1.6]]          | ✓      | -       |
| auto contrast   | p: 0.2                                    | ✓      | -       |
| color jitter    | std: 0.05; p: 0.95                        | ✓      | -       |
| grid sampling   | grid size: 0.02 (indoor), 0.05 (outdoor)  | ✓      | ✓       |
| sphere crop     | ratio: 0.8, max points: 128000            | ✓      | -       |
| normalize color | p: 1                                      | ✓      | -       |

Table 3. The data augmentations.

#### Algorithm 1 Hierarchical Quaternary Partitioning on Serialized Point Cloud

**Require:** Input point cloud  $\mathcal{P} \in \mathbb{R}^{N \times 3}$ , total levels  $K$   
**Ensure:**  $K$ -level hierarchical structure  $\mathcal{H}$

- 1: **function** BuildHierarchy( $\mathcal{P}$ )
- 2:  $\mathcal{P}_{seq} \leftarrow \mathcal{H}(\mathcal{P})$  {Hilbert curve serialization}
- 3:  $\mathcal{P}_{pad} \leftarrow \phi(\mathcal{P}_{seq}, 4^K)$  {Pad to nearest multiple of  $4^K$ }
- 4: **return** QuaternaryPartition( $\mathcal{P}_{pad}$ , 0,  $N_{pad}$ , 1,  $K$ )
- 5: **end function**
- 6: **function** QuaternaryPartition( $\mathcal{P}_{pad}$ ,  $start$ ,  $end$ ,  $k$ ,  $K$ )
- 7:  $S_i^k \leftarrow \{\mathcal{P}_{pad}[j] \mid j \in [start, end]\}$
- 8: **if**  $k = K$  **then**
- 9:   **return**  $S_i^k$
- 10: **end if**
- 11:  $step \leftarrow (end - start) / 4$
- 12:  $mid_1 \leftarrow start + step$
- 13:  $mid_2 \leftarrow start + 2 \times step$
- 14:  $mid_3 \leftarrow start + 3 \times step$
- 15:  $S_{4i}^{k+1} \leftarrow \text{QuaternaryPartition}(\mathcal{P}_{pad}, start, mid_1, k+1, K)$
- 16:  $S_{4i+1}^{k+1} \leftarrow \text{QuaternaryPartition}(\mathcal{P}_{pad}, mid_1, mid_2, k+1, K)$
- 17:  $S_{4i+2}^{k+1} \leftarrow \text{QuaternaryPartition}(\mathcal{P}_{pad}, mid_2, mid_3, k+1, K)$
- 18:  $S_{4i+3}^{k+1} \leftarrow \text{QuaternaryPartition}(\mathcal{P}_{pad}, mid_3, end, k+1, K)$
- 19:  $\mathcal{I}_i^k \leftarrow \{4i, 4i+1, 4i+2, 4i+3\}$  {Store quad-child indices}
- 20: **return**  $S_i^k \cup \{S_{4i}^{k+1}, S_{4i+1}^{k+1}, S_{4i+2}^{k+1}, S_{4i+3}^{k+1}\}$
- 21: **end function** = 0

mapping, and sorting:

$$T(n) = \mathcal{O}(n) + \mathcal{O}(n) = \mathcal{O}(n). \quad (1)$$

### B.2. Hierarchical Segment Initialization

The hierarchical partitioning algorithm for serialized point clouds is detailed in Algorithm 1.

## C. Additional Ablation Studies

Since our oversegmentation network can be combined with a semantic segmentation head to form an end-to-end architecture, we directly optimize a joint loss function as shown in Eq. (2):

$$\ell_{joint} = \delta \ell_{sp} + \ell_{sem} \quad (2)$$

where  $\ell_{sp}$  represents the local discriminative loss for training superpoints, and  $\ell_{sem}$  is the cross-entropy loss for semantic segmentation. The parameter  $\delta$  serves as the weighting factor that controls the influence of the superpoint aggregation loss.

The superpoint loss  $\ell_{sp}$  consists of three components as formulated in Eq. (3):

$$\begin{aligned} \ell_{sp} = & \frac{1}{N_s} \sum_{i=1}^{N_s} \frac{\sum_{p \in S_i} \|f_i - f'_{S_i}\|^2}{|S_i|} + \\ & \frac{1}{N_c} \sum_{i,j \in c, i \neq j} \max(0, \delta_{dist} - \|f'_{S_i} - f'_{S_j}\|)^2 + \\ & \frac{1}{N_s} \sum_{i=1}^{N_s} \sum_{k=1}^K p_{i,k} \log(p_{i,k}) \end{aligned} \quad (3)$$

To investigate the impact of the superpoint loss weighting, we conducted experiments with various  $\delta$  values. Fig. 1 presents the Boundary Precision (BP) metric across training epochs for different weight configurations. The results demonstrate that as  $\delta$  increases from 0 to 1.0, the BP metric maintains relatively high values, with weights of 0.4, 0.5, and 1.0 achieving the best performance (consistently around 30%).

Conversely, when  $\delta$  gradually decreases, particularly when it approaches or equals zero, we observe a dramatic decline in BP performance, dropping to approximately 20% by the end of training. This trend clearly validates the effectiveness of our proposed superpoint aggregation loss formulated in Eq. (3). The higher weights (0.4-1.0) show stable performance across training epochs, while lower weights (0-0.1) exhibit significant degradation over time.

Notably, a weight of 0.2 maintains a reasonable compromise between stability and performance. These findings suggest that proper balancing of the superpoint loss component is crucial for preserving boundary precision in our joint learning framework.

## D. Additional visualization

We further visualized additional superpoints generated by SPCNet and the prediction results on ScanNet and Sem.KITTI, as shown in Fig. 2.

Boundary Precision (BP) Values for Different Superpoint Loss Weights

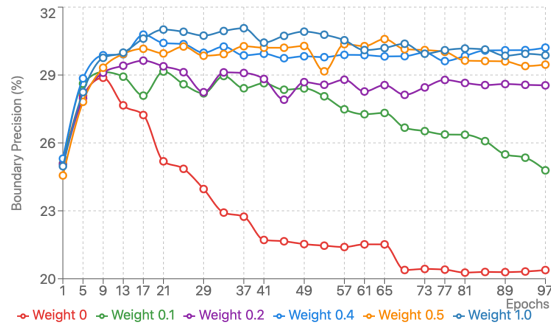

Figure 1. Boundary Precision (BP) values over training epochs for different superpoint loss weights ( $\delta$ ) on the ScanNet.

## E. Limitations

**Sensitivity to Serialization Patterns:** Our voxel serialization relies on 3D Hilbert curves to preserve spatial locality. While effective for regular indoor scenes, this approach may struggle with complex outdoor geometries (*e.g.*, overpasses, multi-level vegetation) where Hilbert ordering could disrupt natural spatial adjacency. The partitioning granularity following a geometric progression  $M_k = 2^{m-2k+2}$  also limits adaptation to scenes with extreme scale variations. Future work could explore adaptive curve selection and dynamic granularity adjustment based on local geometric complexity.

**Task-Specific Feature Coupling:** The end-to-end framework jointly optimizes superpoint generation and semantic segmentation, potentially causing overfitting to segmentation objectives at the expense of generalizable superpoint properties. While our ablation studies validate superpoint quality, the lack of dedicated oversegmentation benchmarks necessitates caution—superpoints optimized for one semantic segmentation dataset may not transfer optimally to other tasks like instance segmentation, where instance segmentation datasets would be needed to optimize superpoints, and superpoint boundaries would then conform to instance object boundaries. Decoupled training protocols or multi-task losses could mitigate this limitation.

## F. Future Work

While the current superpoint refinement method efficiently uses hard assignments based on similarity matching, it risks propagating early errors through misassigned heterogeneous regions. To mitigate this, our framework could integrate two complementary improvements: First, adaptive region-growing along the serialized curve could dynamically merge clusters by expanding from high-confidence seeds until encountering feature divergence thresholds, preserving spatial coherence. Second, semantic-consistency

correction could reassign outlier points by leveraging the observed class dominance within superpoints, statistically reallocating minority-class points to adjacent segments with compatible profiles while respecting hierarchical adjacency constraints. These strategies synergistically balance boundary awareness with topological consistency.

## References

- [1] Pointcept Contributors. Pointcept: A codebase for point cloud perception research. <https://github.com/Pointcept/Pointcept>, 2023. 1
- [2] Xiaoyang Wu, Li Jiang, Peng-Shuai Wang, Zhijian Liu, Xihui Liu, Yu Qiao, Wanli Ouyang, Tong He, and Hengshuang Zhao. Point transformer v3: Simpler faster stronger. In *Proceedings of the IEEE/CVF Conference on Computer Vision and Pattern Recognition*, pages 4840–4851, 2024. 1

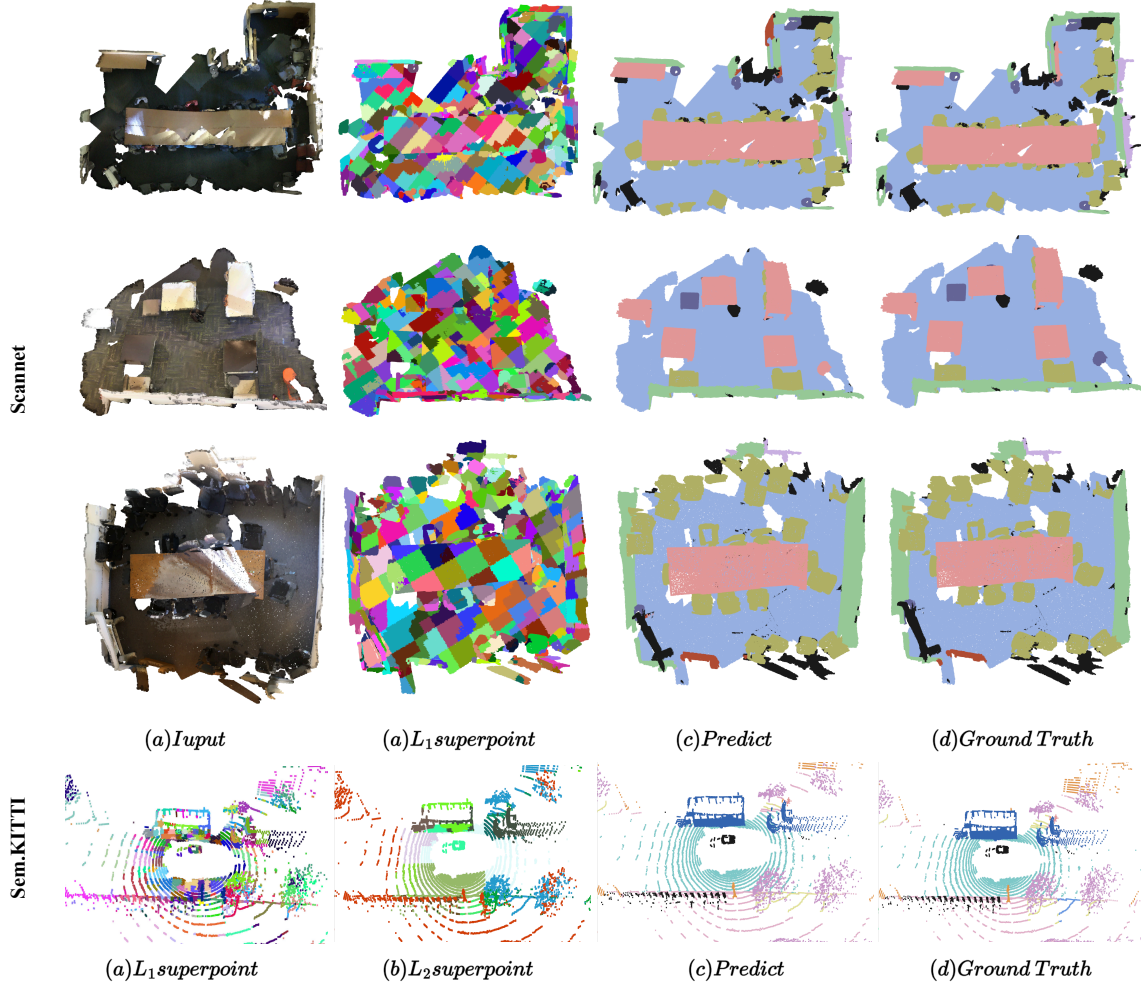

Figure 2. The visualization of superpoints generated on the ScanNet and Sem.KITTI.
